# Supplementary material for: The Effect of Explicit Strategy Instruction on Students’ Reading Comprehension Performance of Ethiopian Secondary School Students
Source: Hindawi journal article supplement (doi:10.1155/2023/1894026), 2023-09-02
Supplement: f2 [file 1894026.f2.pdf]

## 2. Instructor Check sheet for Experimental Fidelity

Instructor: \_\_\_\_\_ Day: \_\_\_\_\_ Week: \_\_\_\_\_ Month: \_\_\_\_\_

Dear teacher, this check sheet is for you to use as a guide when implementing the explicit strategy instruction in the EG's class. So, please put a checkmark in the box for each day of the week to indicate that you implemented each of the elements of strategy training listed in the table below. If you were unable to implement any one of these elements, please give reasons or comments in the space provided below the table. Thank you!

|    | <b>Elements of Strategy-Based Instruction</b>                                                                                                                            | <b>Day 1</b> | <b>Day2</b> |
|----|--------------------------------------------------------------------------------------------------------------------------------------------------------------------------|--------------|-------------|
| 1  | I write the topic of the daily lesson on the chalkboard or poster and explain its objective                                                                              |              |             |
| 2  | I provide students with certain brainstorming activities to activate their background knowledge and help them to guess the meaning of difficult words during pre-reading |              |             |
| 3  | I explicitly models the strategies during the pre-reading phase                                                                                                          |              |             |
| 4  | I introduce, present, model and practice two or three listening strategies during each classroom lesson during reading stage                                             |              |             |
| 5  | I give learners adequate time to practice the reading strategies previously presented & modeled by the teacher.                                                          |              |             |
| 6  | I give learners enough time to summarize a short reading text and report their summaries orally at the post reading stage, and evaluate their progress                   |              |             |
| 7  | I encourage learners to ask or answer questions and to participate in group discussions when necessary                                                                   |              |             |
| 8  | I guide or organize learners to do reading tasks in pairs or groups before and after each daily lesson                                                                   |              |             |
| 9  | I give enough time for learners to compare and evaluate their understandings of the newly learnt strategies and reading text.                                            |              |             |
| 10 | I promote students to use reading strategies in different texts outside the class                                                                                        |              |             |

Reasons: \_\_\_\_\_

\_\_\_\_\_

Comments: \_\_\_\_\_

\_\_\_\_\_

\_\_\_\_\_
